# Supplementary material
Source: publisher figshare collection journal article supplement (https://karger.figshare.com/ndownloader/files/23655341)
Supplement: Supplementary file 1 [file 23655341]

Supplementary Table 1. Characteristics of the studies included in the meta-analysis. NA = not available.
